# Supplementary material
Source: ML conference proceedings conference paper supplement (https://proceedings.neurips.cc/paper_files/paper/2010/hash/8f121ce07d74717e0b1f21d122e04521-Abstract.html)
Supplement: Supplementary file [file 8f121ce07d74717e0b1f21d122e04521-Supplemental.zip]

---

# Multivariate Dyadic Regression Trees for Sparse Learning Problems

## Appendix

---

Han Liu and Xi Chen  
 School of Computer Science, Carnegie Mellon University  
 Pittsburgh, PA 15213

### 1 Pseudocode for Greedy Tree Learning Algorithm

---

#### Algorithm 1 Tree Growing

---

**Input:**  $\{\mathbf{x}^i, \mathbf{y}^i\}_{i=1}^n, m, n_{\max}, L, \text{deterministic}$

Build the initial tree  $T$  with a single root node  $r$  containing all the data points and set  $\mathcal{A}(r) \leftarrow \emptyset$

**while**  $\exists t \in \text{term}(T)$  such that  $n(t) > n_{\max}$  or  $|\mathcal{A}(t)| < d$  **do**

**if**  $|\mathcal{A}(t)| < d$  **then**

**for all** dimension  $k \notin \mathcal{A}(t)$  **do**

calculate  $\Delta \hat{R}_1^m(t, k)$

**end for**

**end if**

**if**  $n(t) > n_{\max}$  **then**

**for all** dimension  $k \in \mathcal{A}(t)$  **do**

**if**  $\text{sl}(t^{(k)}) \geq 2^{-L+1}$  **then**

calculate  $\Delta \hat{R}_2^m(t, k)$

**end if**

**end for**

**end if**

**if deterministic then**

$(a^*, k^*) = \underset{a \in \{1, 2\}, k \in \{1 \dots d\}}{\text{argmax}} \Delta \hat{R}_a^m(t, k)$

**else**

Normalize  $\Delta \hat{R}$  to 1. Draw the sample  $(a^*, k^*)$  from the multinomial(1,  $\Delta \hat{R}$ )

**end if**

**if**  $a^* = 1$  **then**

Dyadically split the cell represented by node  $t$  perpendicular to dimension  $k^*$  and update  $T$

**else**

$\mathcal{A}(t) \leftarrow \mathcal{A}(t) \cup \{k\}$

**end if**

**end while**

**Output:** Tree  $T$

---

Note the boolean variable *deterministic* indicates whether the procedure is purely greedy or randomized.

---

**Algorithm 2** Cost Complexity Pruning

---

**Input:** Tree  $T$ , parameter  $\lambda$  for calculating  $\widehat{C}(T)$

$i \leftarrow 1, T_1 \leftarrow T$

**while**  $T_i$  has more than one node **OR**  $T_i$  only has the root node  $r$  with  $\mathcal{A}(r) \neq \emptyset$  **do**

$T^{(1)} \leftarrow \underset{t_L, t_R \in \text{term}(T_i)}{\text{argmin}} \widehat{C}(\text{Tree obtained by merging}$

$t_L, t_R \text{ in } T_i)$   
 $T^{(2)} \leftarrow \underset{t \in \text{term}(T_i), k \in \mathcal{A}(t) \setminus \mathcal{A}(\text{par}(t))}{\text{argmin}} \widehat{C}(\text{Tree obtained}$   
by removing the dimension  $k$  from  $\mathcal{A}(t))$

$T_{i+1} \leftarrow \underset{T^{(l)} \in \{1, 2\}}{\text{argmin}} \widehat{C}(T^{(l)})$

$i \leftarrow i + 1$

**end while**

$i^* \leftarrow \underset{i}{\text{argmin}} \widehat{C}(T_i)$

**Output:** Optimal Tree  $T_{i^*}$ 

---
